# Supplementary material
Source: publisher figshare collection journal article supplement (https://gsajournals.figshare.com/articles/dataset/_/9733838)
Supplement: Supplementary file 1 [file 1]

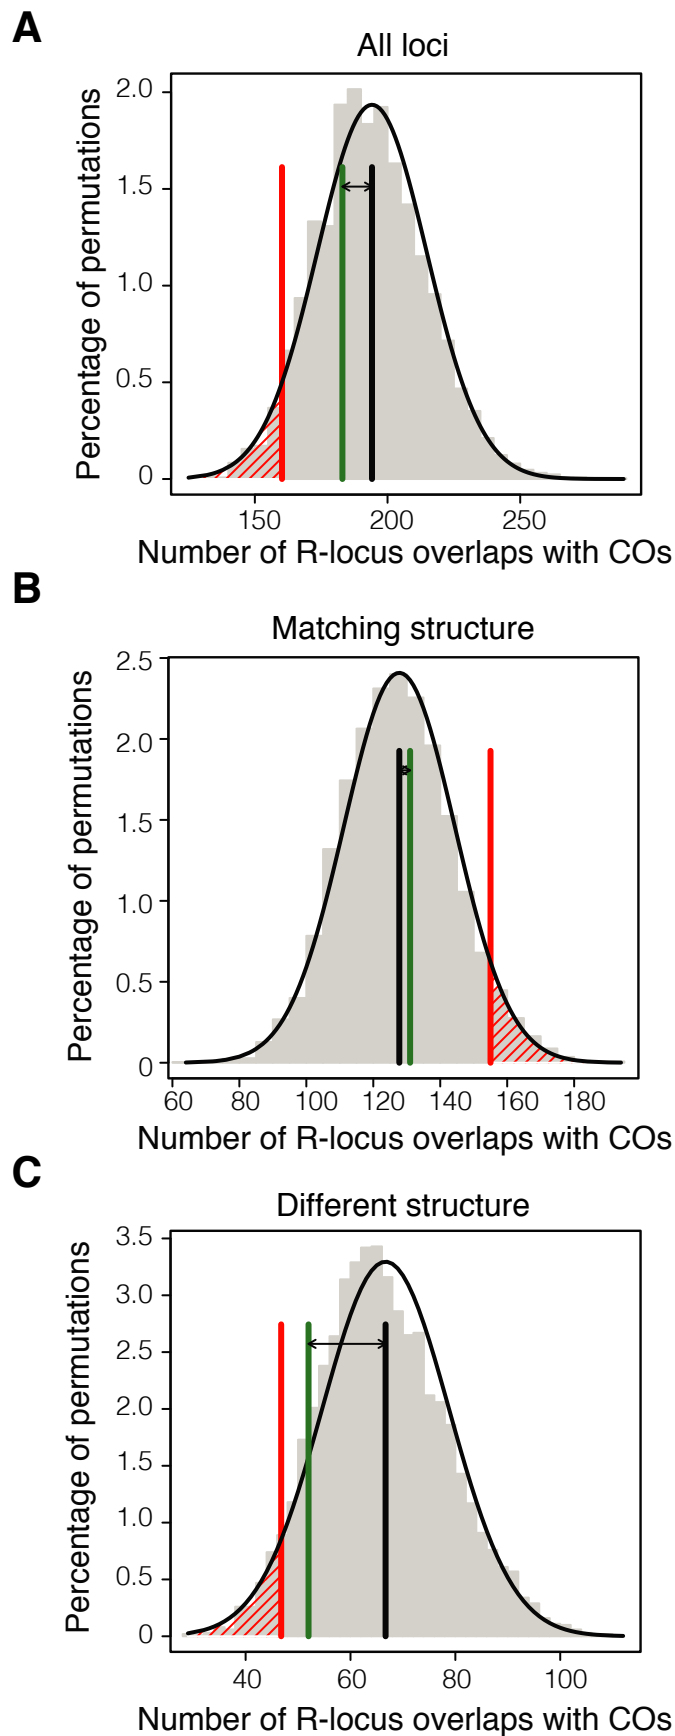

**Figure S11. Permutation tests of the overlaps between COs and NLR genes.** Permutation tests for all NLR loci (A) and subsets where the locus structure is the same between Col and Ler (B) and different between Col and Ler (C). For all plots, the vertical black line indicates mean number of overlaps expected in 5,000 random permutations. Vertical red line indicates the number of overlaps where  $p = 0.05$ . Vertical green line indicates the observed number of overlaps. Double arrow highlights the difference between the mean from 5,000 permutations and the observed number.
