# Supplementary material
Source: publisher figshare collection journal article supplement (https://gsajournals.figshare.com/articles/dataset/_/9733838)
Supplement: Supplementary file 2 [file 1]

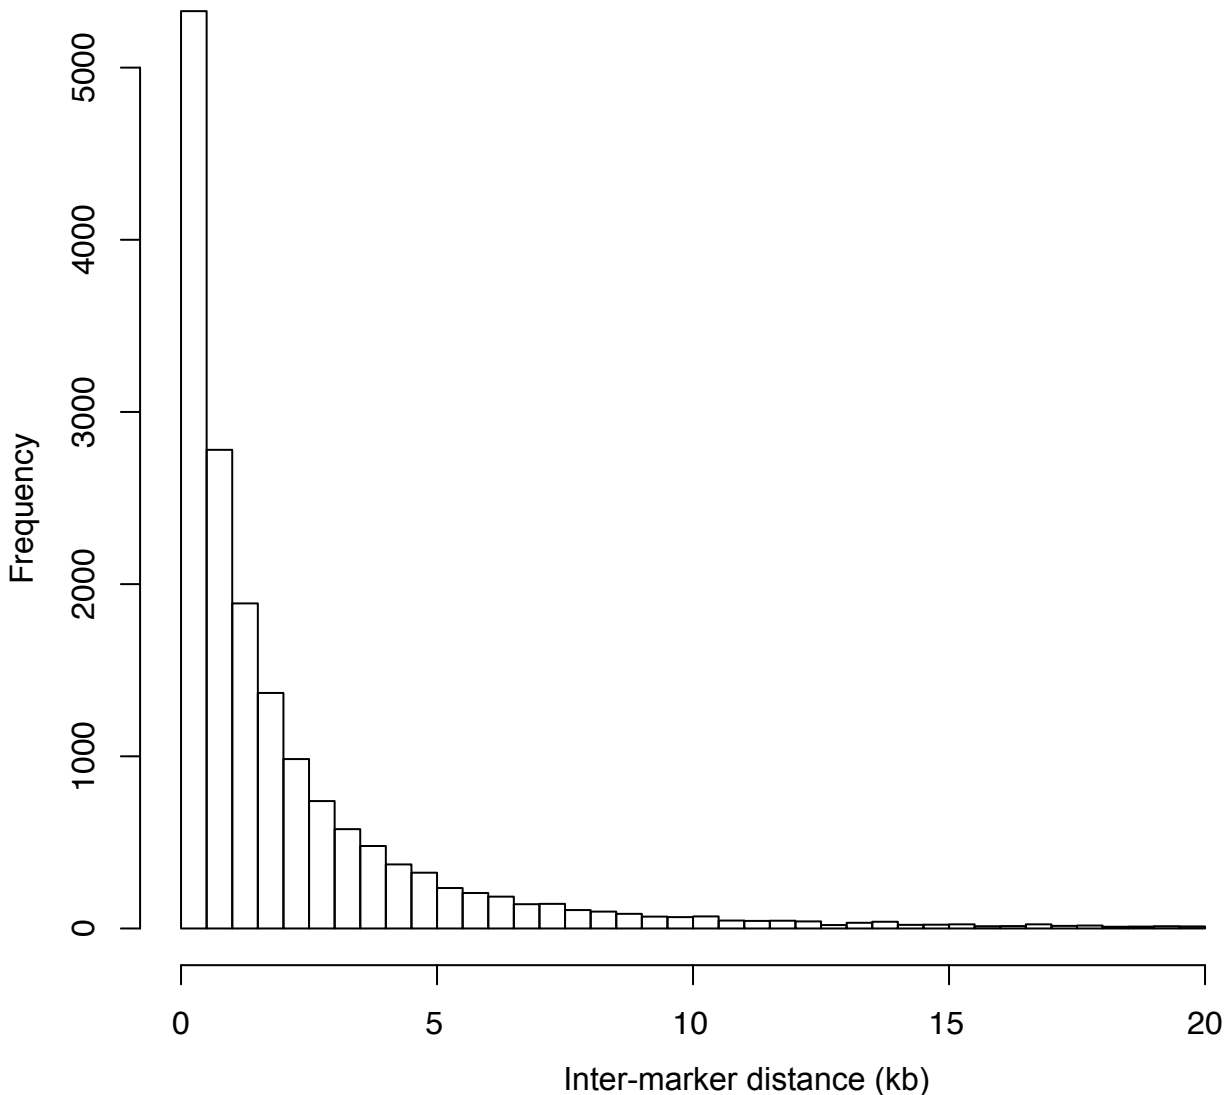

**Figure S3. Crossover resolution.** The interval window for CO breakpoint estimation (calculated by the distance between flanking markers determined by TIGER). Shown are the intervals for 16,709 of 17,077 total COs, as intervals > 20 kb have been omitted for ease of visualization.
