# Supplementary material
Source: publisher figshare collection journal article supplement (https://gsajournals.figshare.com/articles/dataset/_/9733838)
Supplement: Supplementary file 3 [file 1]

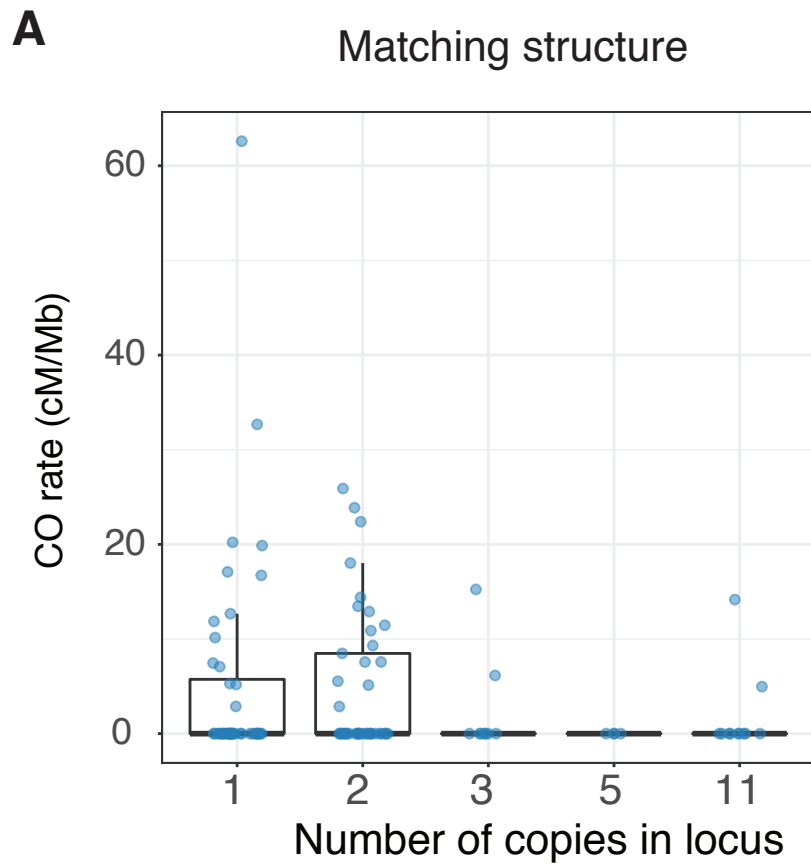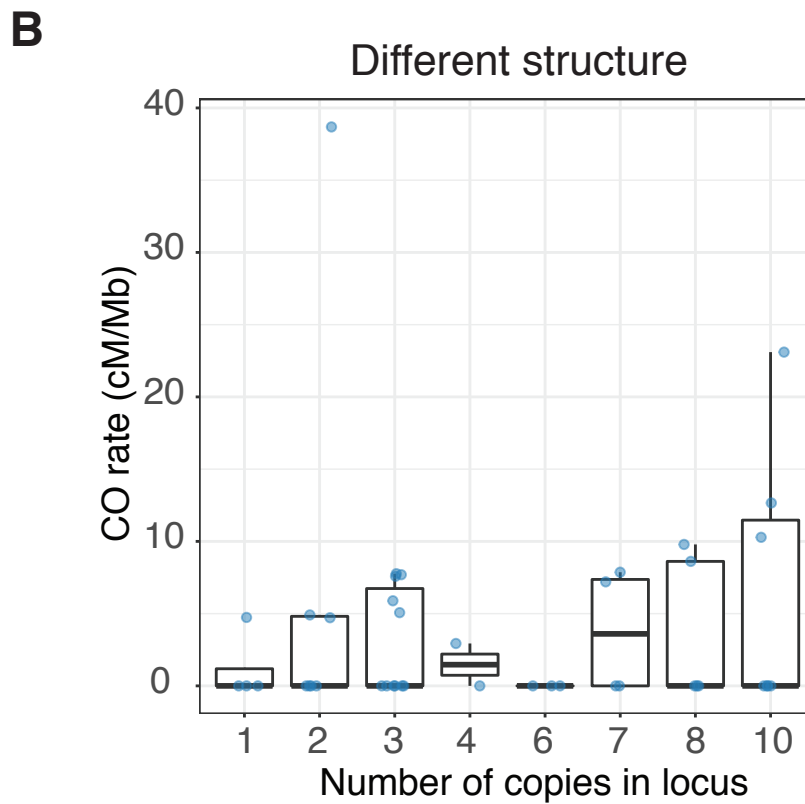

**Figure S12. Crossovers in R-genes relative to the number of copies in the the locus.** Boxplots with individual data points (light blue dots) display the CO rates within each locus type for loci where Col and Ler have the same number of copies in the locus (A) and loci where Col and Ler have different numbers of copies in the locus (B). Boxplots display the median and the first and third quartiles.
