# Supplementary material
Source: publisher figshare collection journal article supplement (https://gsajournals.figshare.com/articles/dataset/_/9733838)
Supplement: Supplementary file 4 [file 1]

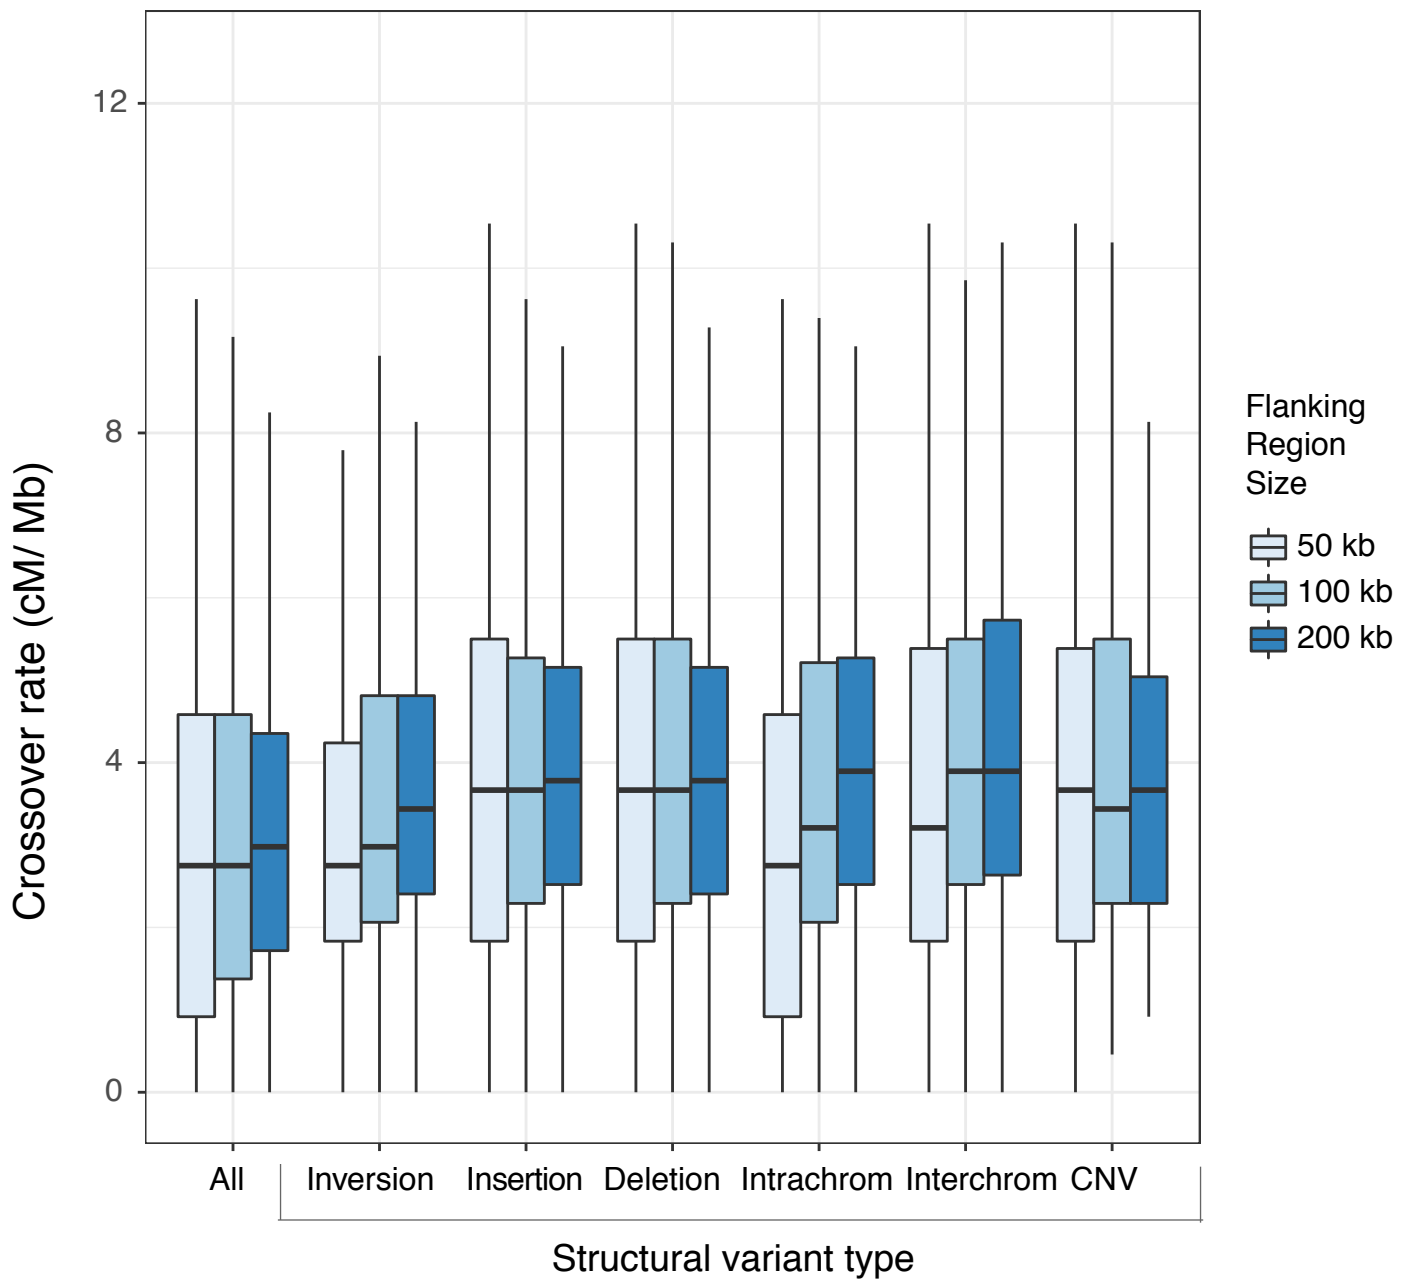

**Figure S8. CO rates in the 50-, 100-, and 200-kb up- and downstream of structural variants.** Boxplots show the distributions of CO rates in windows of the indicated sizes that are surrounding inversions, insertions, deletions, transpositions (intrachrom), translocations (interchrom), copy number variations (CNV) and all windows genome-wide (All). Boxplots display the median and the first and third quartiles.
