# Supplementary material
Source: publisher figshare collection journal article supplement (https://gsajournals.figshare.com/articles/dataset/_/9733838)
Supplement: Supplementary file 5 [file 1]

**A**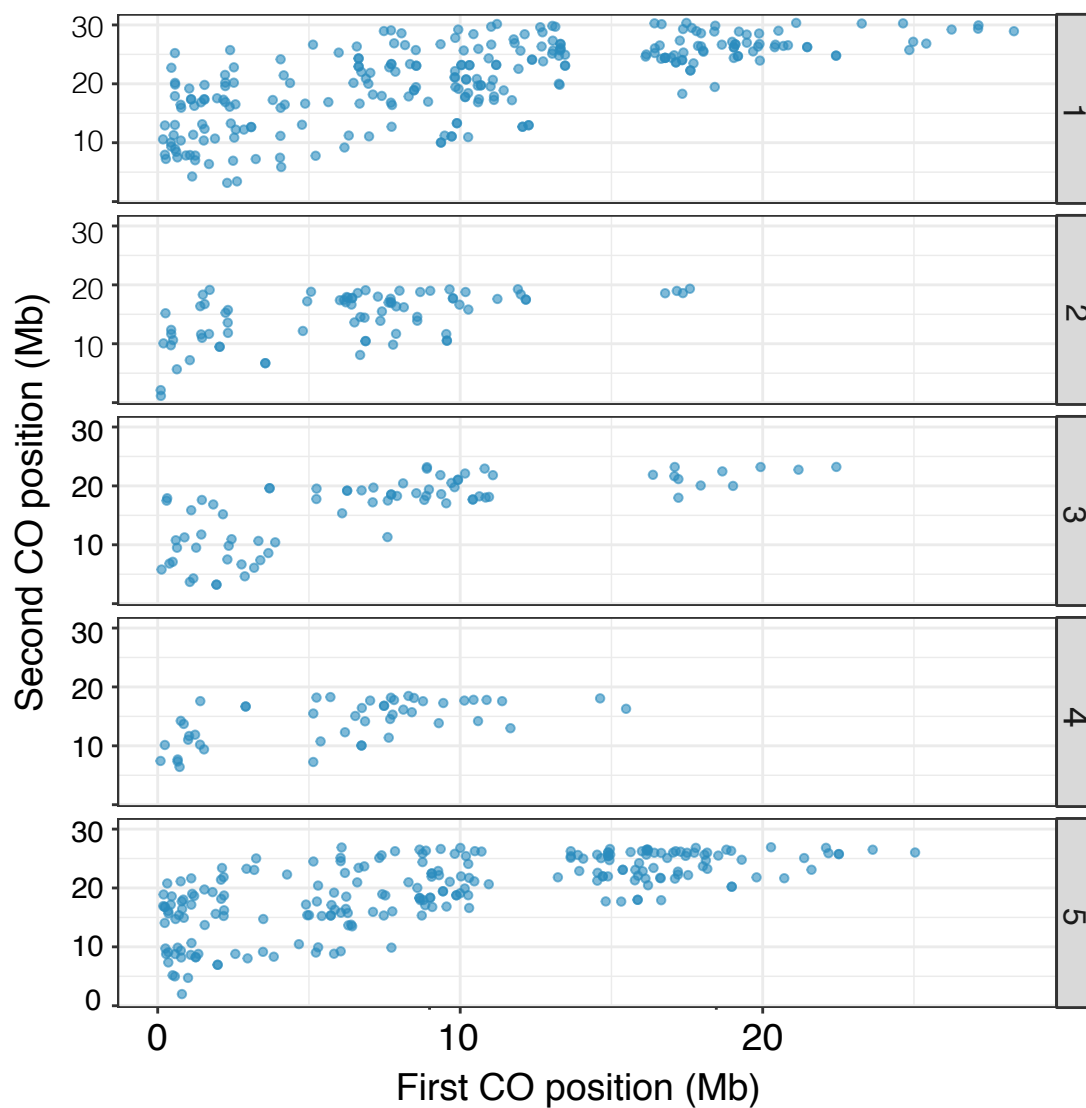**B**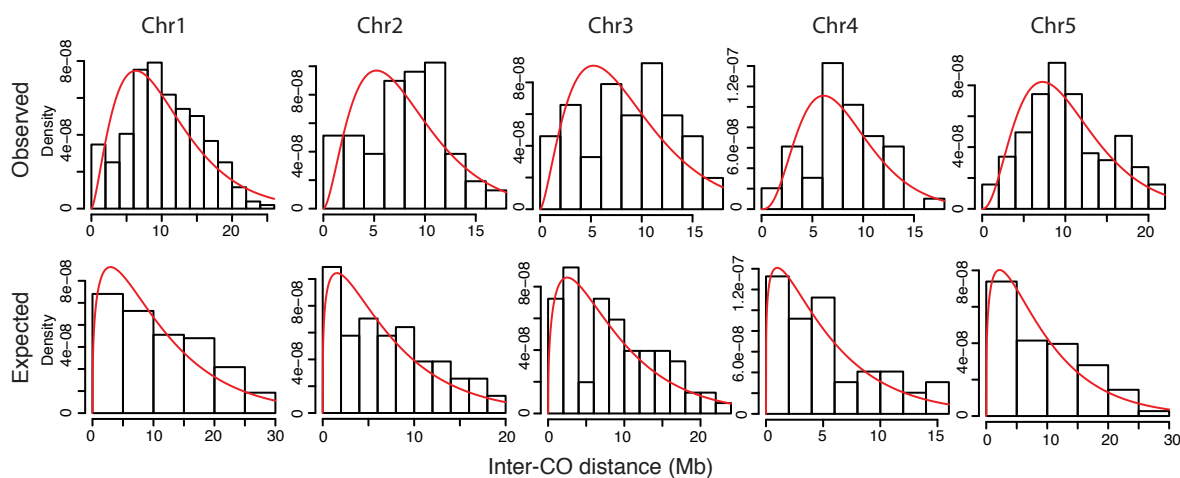

**Figure S5. Positions of cis double crossovers along chromosomes.** A) The positions of the first and second COs for pairs of double COs are plotted along the chromosomes. The chromosome number is indicated in the gray boxes to the right of the plots. B) Gamma distribution fits (red lines) to the observed inter-crossover distances (top row) compared with a random sampling of double crossovers (bottom row) for each chromosome.
