# Supplementary material
Source: publisher figshare collection journal article supplement (https://gsajournals.figshare.com/articles/dataset/_/9733838)
Supplement: Supplementary file 6 [file 1]

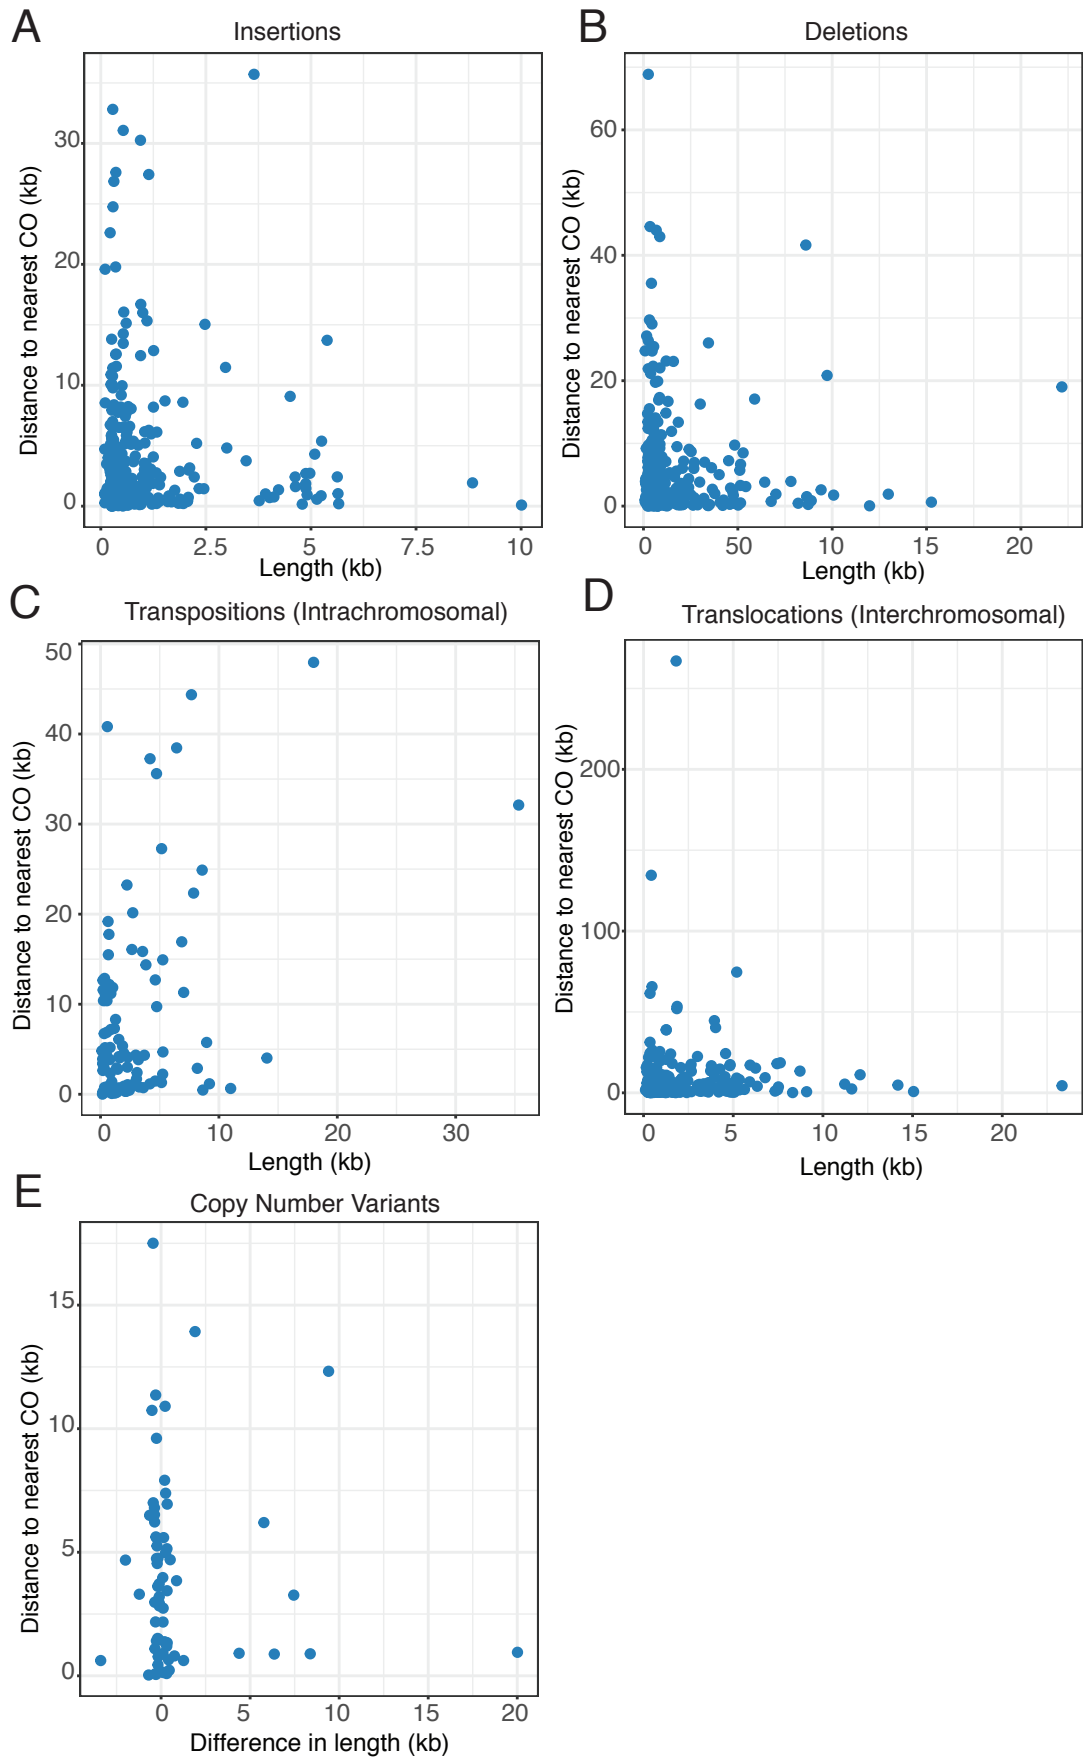

**Figure S7. Distance to nearest crossover position from the borders of structural variants as a function of the size of the variant region.** Linear regressions revealed no significant correlation between variant size and the distance to the nearest CO position for any of the variants shown in the plots.
