# Supplementary material
Source: publisher figshare collection journal article supplement (https://gsajournals.figshare.com/articles/dataset/_/9733838)
Supplement: Supplementary file 7 [file 1]

**A**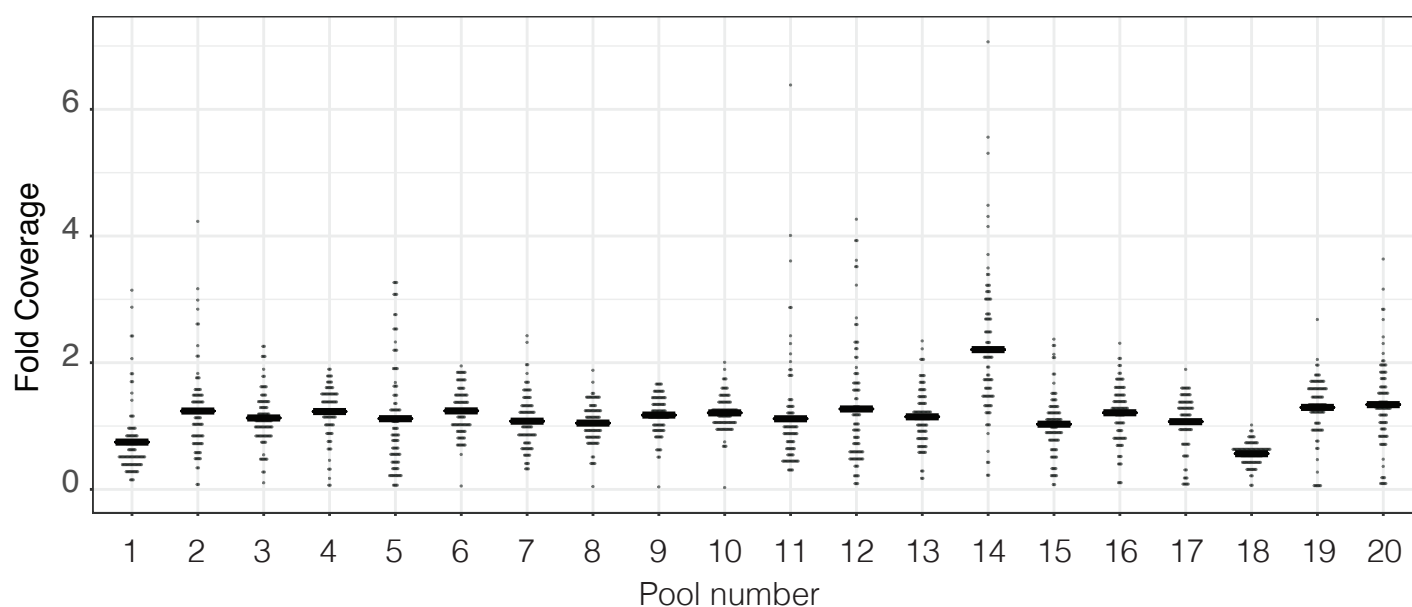**B**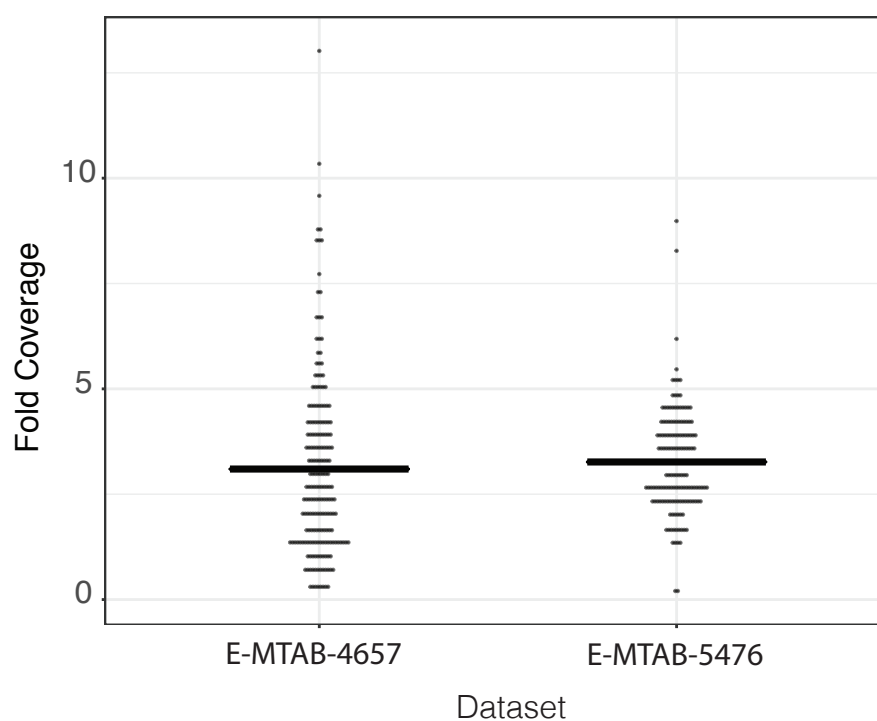

**Figure S2. Coverage distributions among samples.** A) Coverage plots for each 96-sample pool for all of the genomic DNA libraries for the 1920 Col X Ler F2 individuals produced for this study. B) Coverage plots for publicly available read data for additional F2 individuals derived from the same parental backgrounds categorized by their accession numbers at ArrayExpress. Data points are displayed in 0.2x coverage bins. Cross bar indicates the mean.
