# Supplementary material
Source: publisher figshare collection journal article supplement (https://gsajournals.figshare.com/articles/dataset/_/9733838)
Supplement: Supplementary file 10 [file 1]

**Table S1. Genetic distances.**

| <b>Interval</b> | <b>Chr</b> | <b>Starting position</b> | <b>Ending position</b> | <b>cM (Whole genome)</b> | <b>cM (Reporters)</b> |
|-----------------|------------|--------------------------|------------------------|--------------------------|-----------------------|
| <i>l1b</i>      | 1          | 3,905,441                | 5,755,618              | 4.9                      | 6.6                   |
| <i>l1fg</i>     | 1          | 24,645,163               | 25,956,590             | 5.6                      | 8.2                   |
| <i>l2f</i>      | 2          | 18,286,716               | 18,957,093             | 3.3                      | 7.6                   |
| <i>420</i>      | 3          | 256,516                  | 5,361,637              | 14.3                     | 12.3                  |
| <i>CEN3</i>     | 3          | 11,115,724               | 16,520,560             | 10.2                     | 11.9                  |

Comparison of genetic distances in reporter intervals estimated from the whole-genome analysis presented in this study compared with those previously estimated from fluorescent reporters ([Ziolkowski et al. 2015](#)). Note that the estimates for the intervals *l1b*, *l1fg*, *l2f*, and *CEN3* are based on pollen reporters and represent male meiosis only. The whole genome data calculated from the study of crossovers (COs) in F<sub>2</sub> plants and the *420* interval in both datasets reflect sex-averaged genetic distances.

**Table S2. Overlaps between CO intervals and structural variants**

| <b>Variant type</b>               | <b>Total Number</b> | <b>Number of overlaps with CO intervals (observed)</b> | <b>Mean number of overlaps with CO intervals (permuted)</b> |
|-----------------------------------|---------------------|--------------------------------------------------------|-------------------------------------------------------------|
| Inversion                         | 38                  | 13*                                                    | 246.4                                                       |
| Insertion                         | 311                 | 134*                                                   | 231.8                                                       |
| Deletion                          | 426                 | 156*                                                   | 238                                                         |
| Transpositions (Intrachromosomal) | 102                 | 113*                                                   | 255.6                                                       |
| Translocations (Interchromosomal) | 271                 | 159*                                                   | 297.8                                                       |
| Copy Number Variations            | 67                  | 38                                                     | 53.8                                                        |

\*p < 0.05 after 5000 permutations

**Table S3. Crossover rates in flanking regions up- and downstream of structural variants**

|                                     | 50 kb CO rate<br>(cM/Mb) | 100 kb CO rate<br>(cM/Mb) | 200 kb CO rate<br>(cM/Mb) |
|-------------------------------------|--------------------------|---------------------------|---------------------------|
| Genome mean                         | 3.2                      | 3.2                       | 3.2                       |
| Inversion                           | 3.4                      | 3.6                       | 3.8                       |
| Insertion                           | 4.3                      | 4.3                       | 4.1                       |
| Deletion                            | 4.3                      | 4.2                       | 4.1                       |
| Transposition<br>(Interchromosomal) | 3.7                      | 3.8                       | 4.1                       |
| Translocation<br>(Intrachromosomal) | 4.3                      | 4.4                       | 4.4                       |
| Copy Number<br>Variation            | 4.4                      | 4.2                       | 4.0                       |

**Table S4. CO frequency in defense genes**

| <b>Gene Annotation</b>  | <b>Number of Genes</b> | <b>Number of Genes with COs</b> | <b>Proportion of Genes with COs</b> |
|-------------------------|------------------------|---------------------------------|-------------------------------------|
| CNL                     | 26                     | 9                               | 0.35                                |
| NB-ARC                  | 15                     | 6                               | 0.4                                 |
| NB-LRR                  | 10                     | 1                               | 0.1                                 |
| P-loop protein          | 6                      | 0                               | 0                                   |
| Phloem protein          | 4                      | 0                               | 0                                   |
| TIR-NBS                 | 13                     | 2                               | 0.15                                |
| TIR family              | 20                     | 5                               | 0.25                                |
| TNL                     | 87                     | 29                              | 0.33                                |
| Transmembrane receptors | 4                      | 1                               | 0.25                                |
| Other                   | 12                     | 2                               | 0.17                                |

**Table S5. CO Frequency of sequence motifs associated with a random subset of 2500 crossovers**

| Motif                    | Number | Percent |
|--------------------------|--------|---------|
| PolyA/T                  | 2102   | 84.1    |
| CTT/GAA                  | 1141   | 45.6    |
| CT/GA                    | 943    | 37.0    |
| CCN/GGN                  | 304    | 12.2    |
| PolyA/T or CTT/GAA       | 2292   | 91.7    |
| All four motifs combined | 2363   | 94.5    |
