# Supplementary material
Source: publisher figshare collection journal article supplement (https://gsajournals.figshare.com/articles/dataset/_/9733838)
Supplement: Supplementary file 11 [file 1]

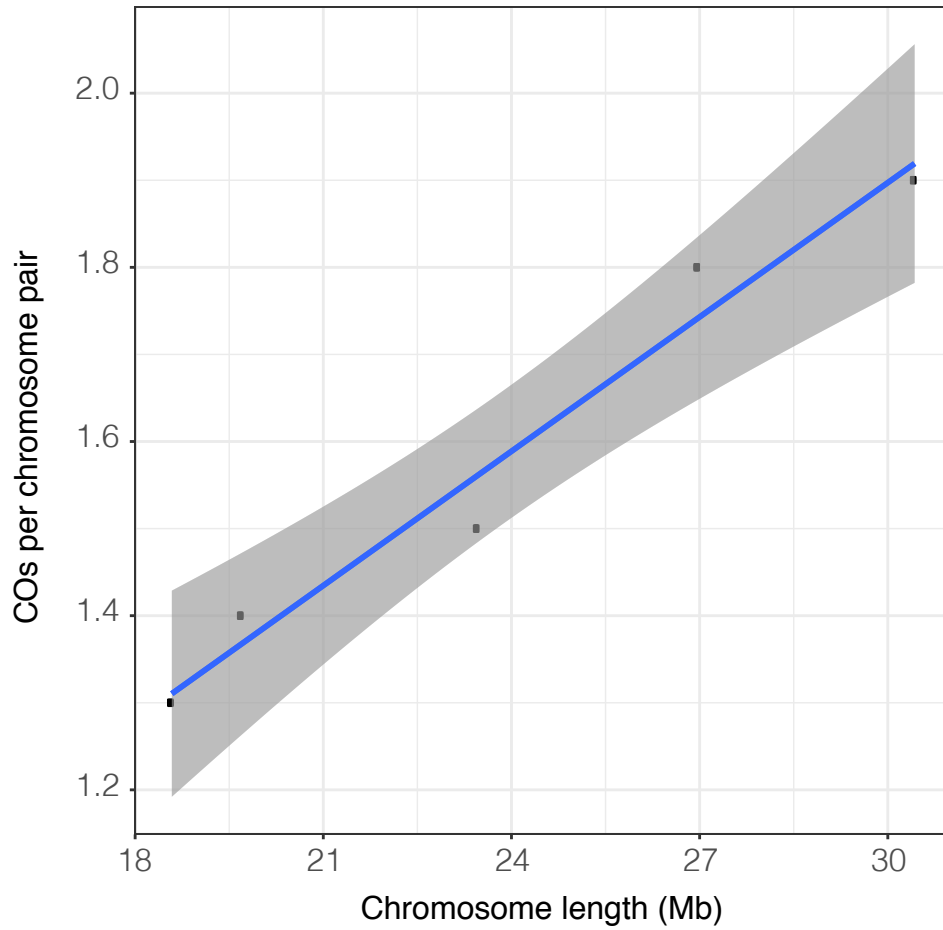

**Figure S4. CO per pair as a function of chromosome length.** The equation of the line is  $5.14 \cdot 10^{-08} x + 0.355$  ( $R^2 = 0.96$ ). The gray shaded area represents the 95% confidence interval.
