# Supplementary material
Source: publisher figshare collection journal article supplement (https://gsajournals.figshare.com/articles/dataset/_/9733838)
Supplement: Supplementary file 12 [file 1]

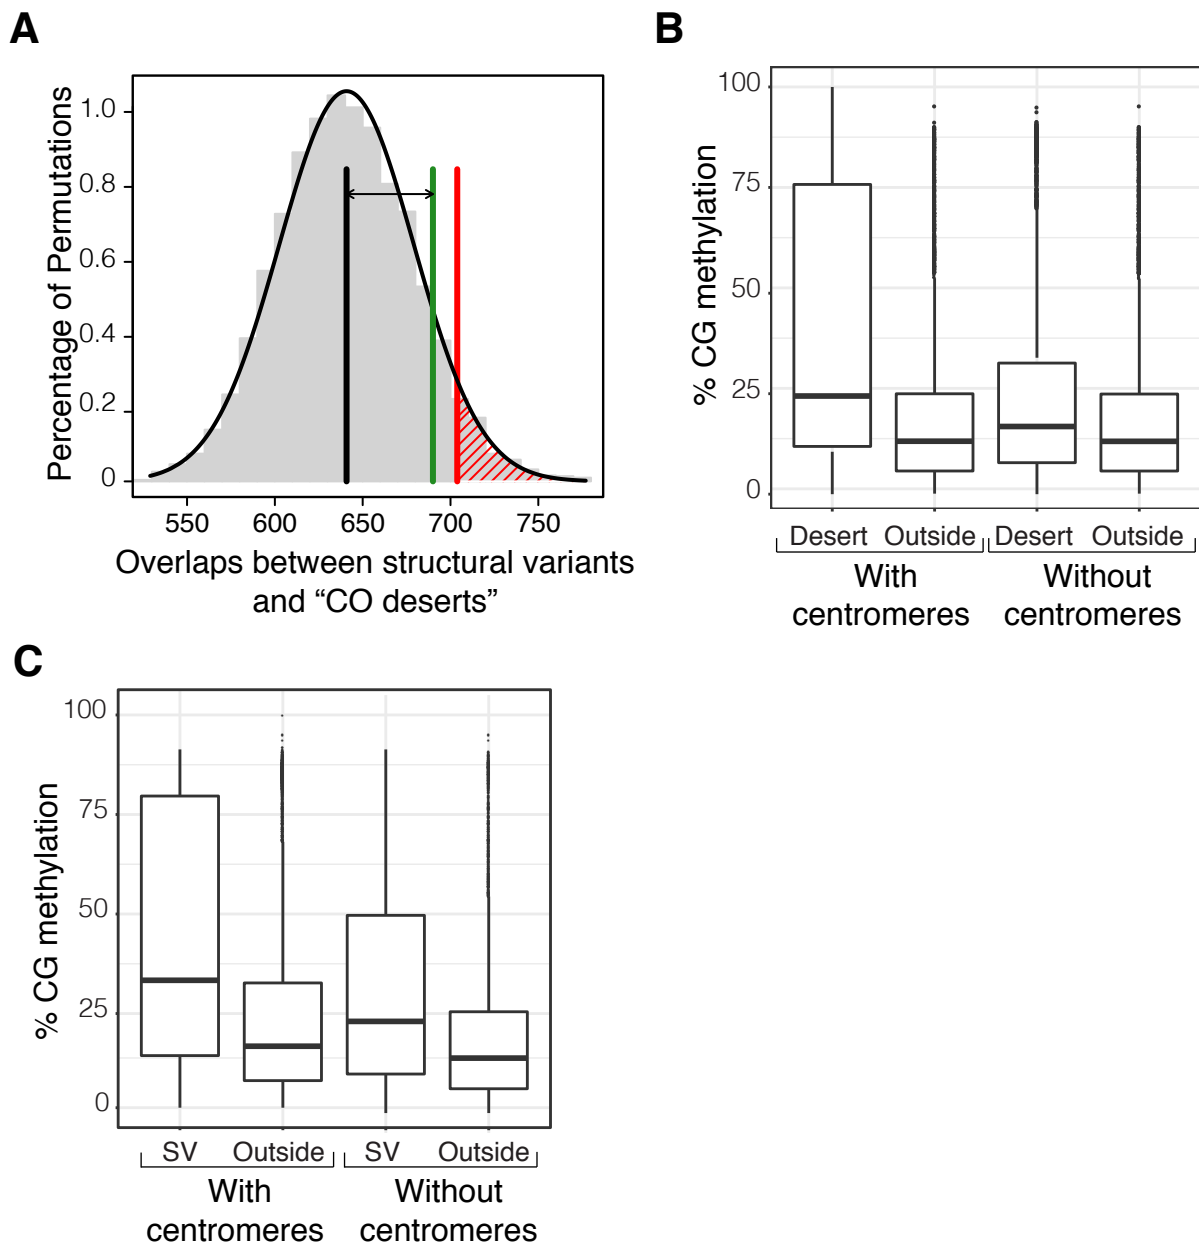

**Figure S10. Relationships among structural variants (SVs), "CO deserts", and DNA methylation at CG positions.** A) Overlaps between CO-depleted regions "CO deserts" and SVs. Vertical black line indicates mean number of overlaps expected in 5000 random permutations. Vertical red line indicates the number of overlaps where  $p = 0.05$ . Vertical green line indicates the observed number of overlaps. Double-headed arrow highlights the difference between the mean of 5000 permutations and the observed number. B) Box plots showing the percentage of DNA methylation at CG positions in 10-kb windows that overlap with "CO deserts" (Desert) and those that do not (Outside) either with centromeric regions included or excluded. C) Box plots showing the percentage of DNA methylation at CG positions in 10-kb windows that overlap with structural variants (SV) and those that do not (Outside) either with centromeric regions included or excluded. Boxplots display the median and the first and third quartiles.
