# Supplementary material
Source: publisher figshare collection journal article supplement (https://gsajournals.figshare.com/articles/dataset/_/9733838)
Supplement: Supplementary file 14 [file 1]

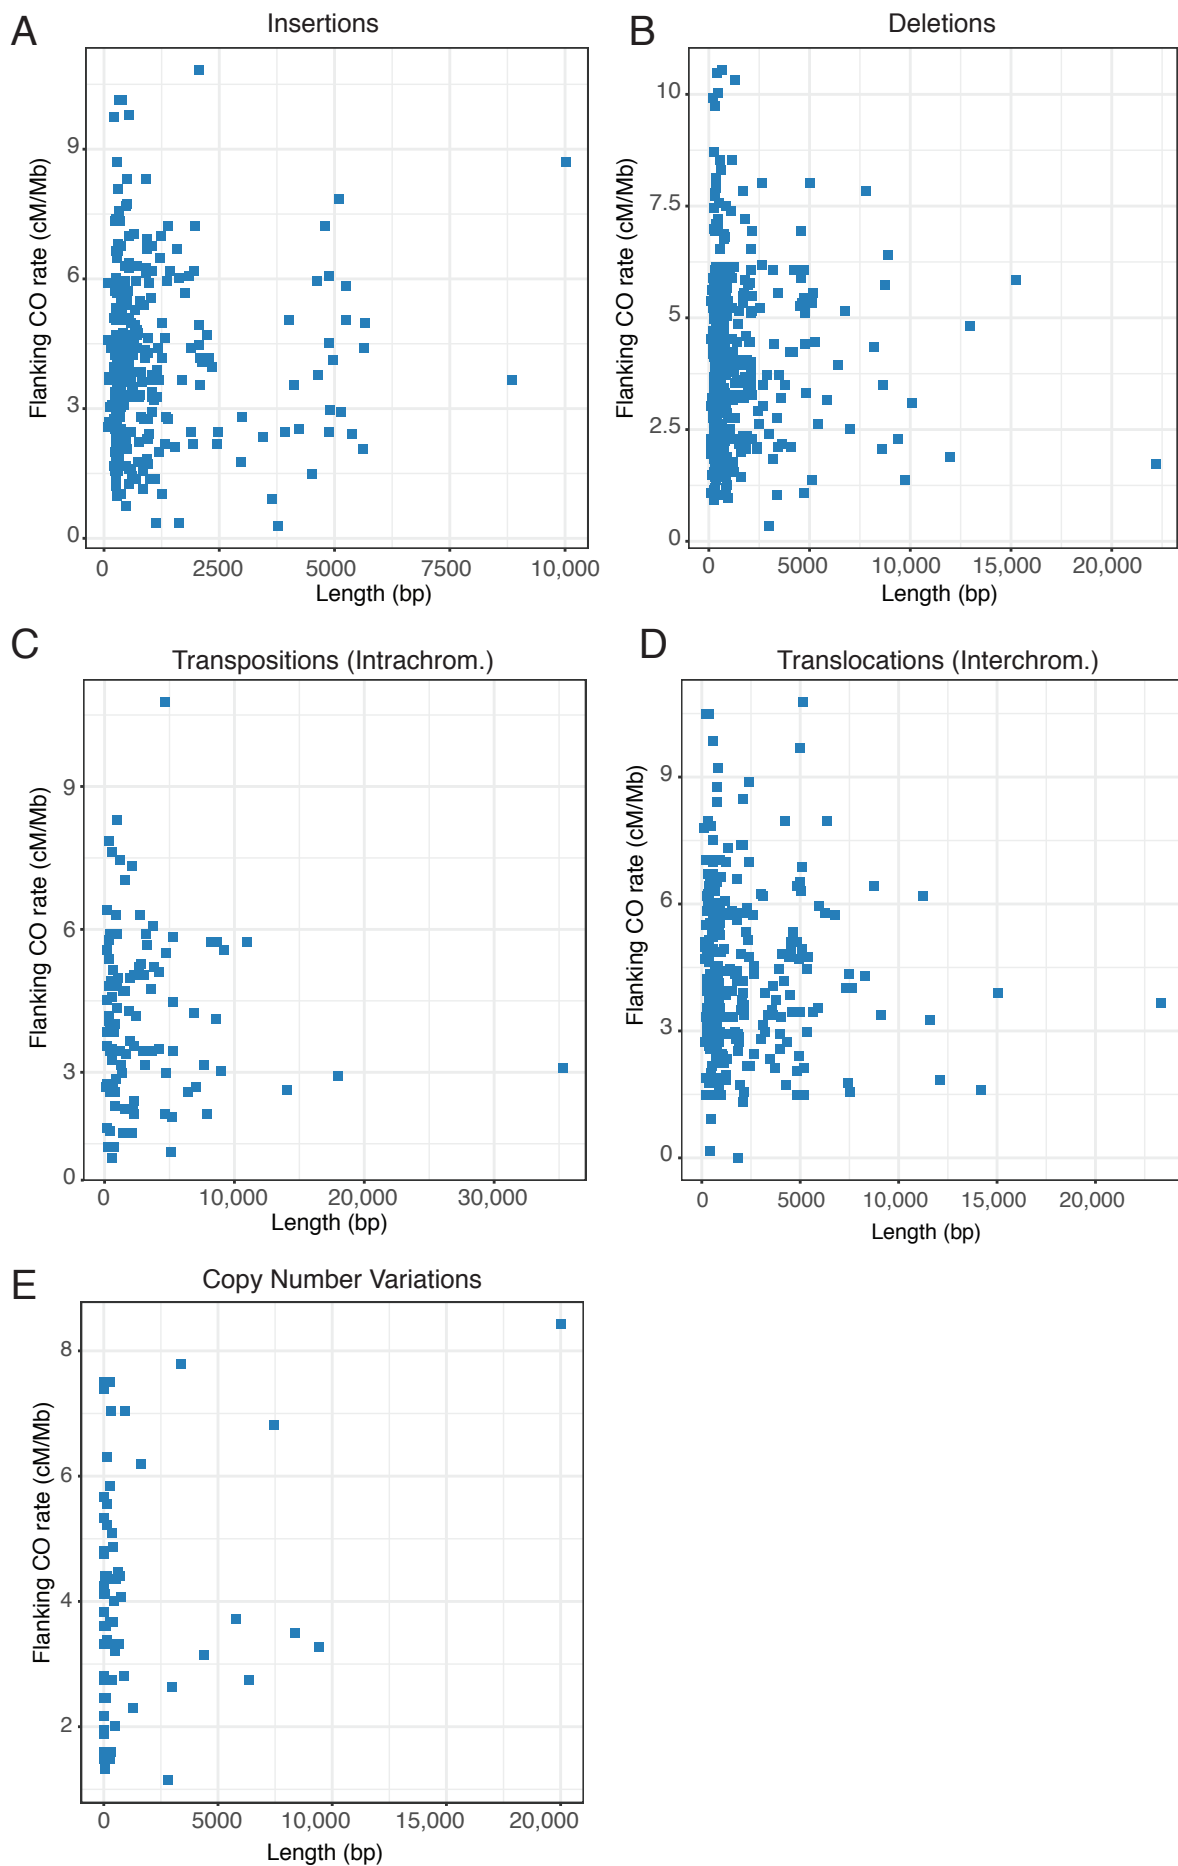

**Figure S9. Mean CO rates in the 200-kb up- and downstream of structural variants.** Linear regressions revealed a significant correlation between variant size and the mean flanking CO rates only for copy number variations ( $p = 0.05$  with an  $R^2$  value of 0.05).
