# Supplementary material
Source: publisher figshare collection journal article supplement (https://gsajournals.figshare.com/articles/dataset/_/9733838)
Supplement: Supplementary file 15 [file 1]

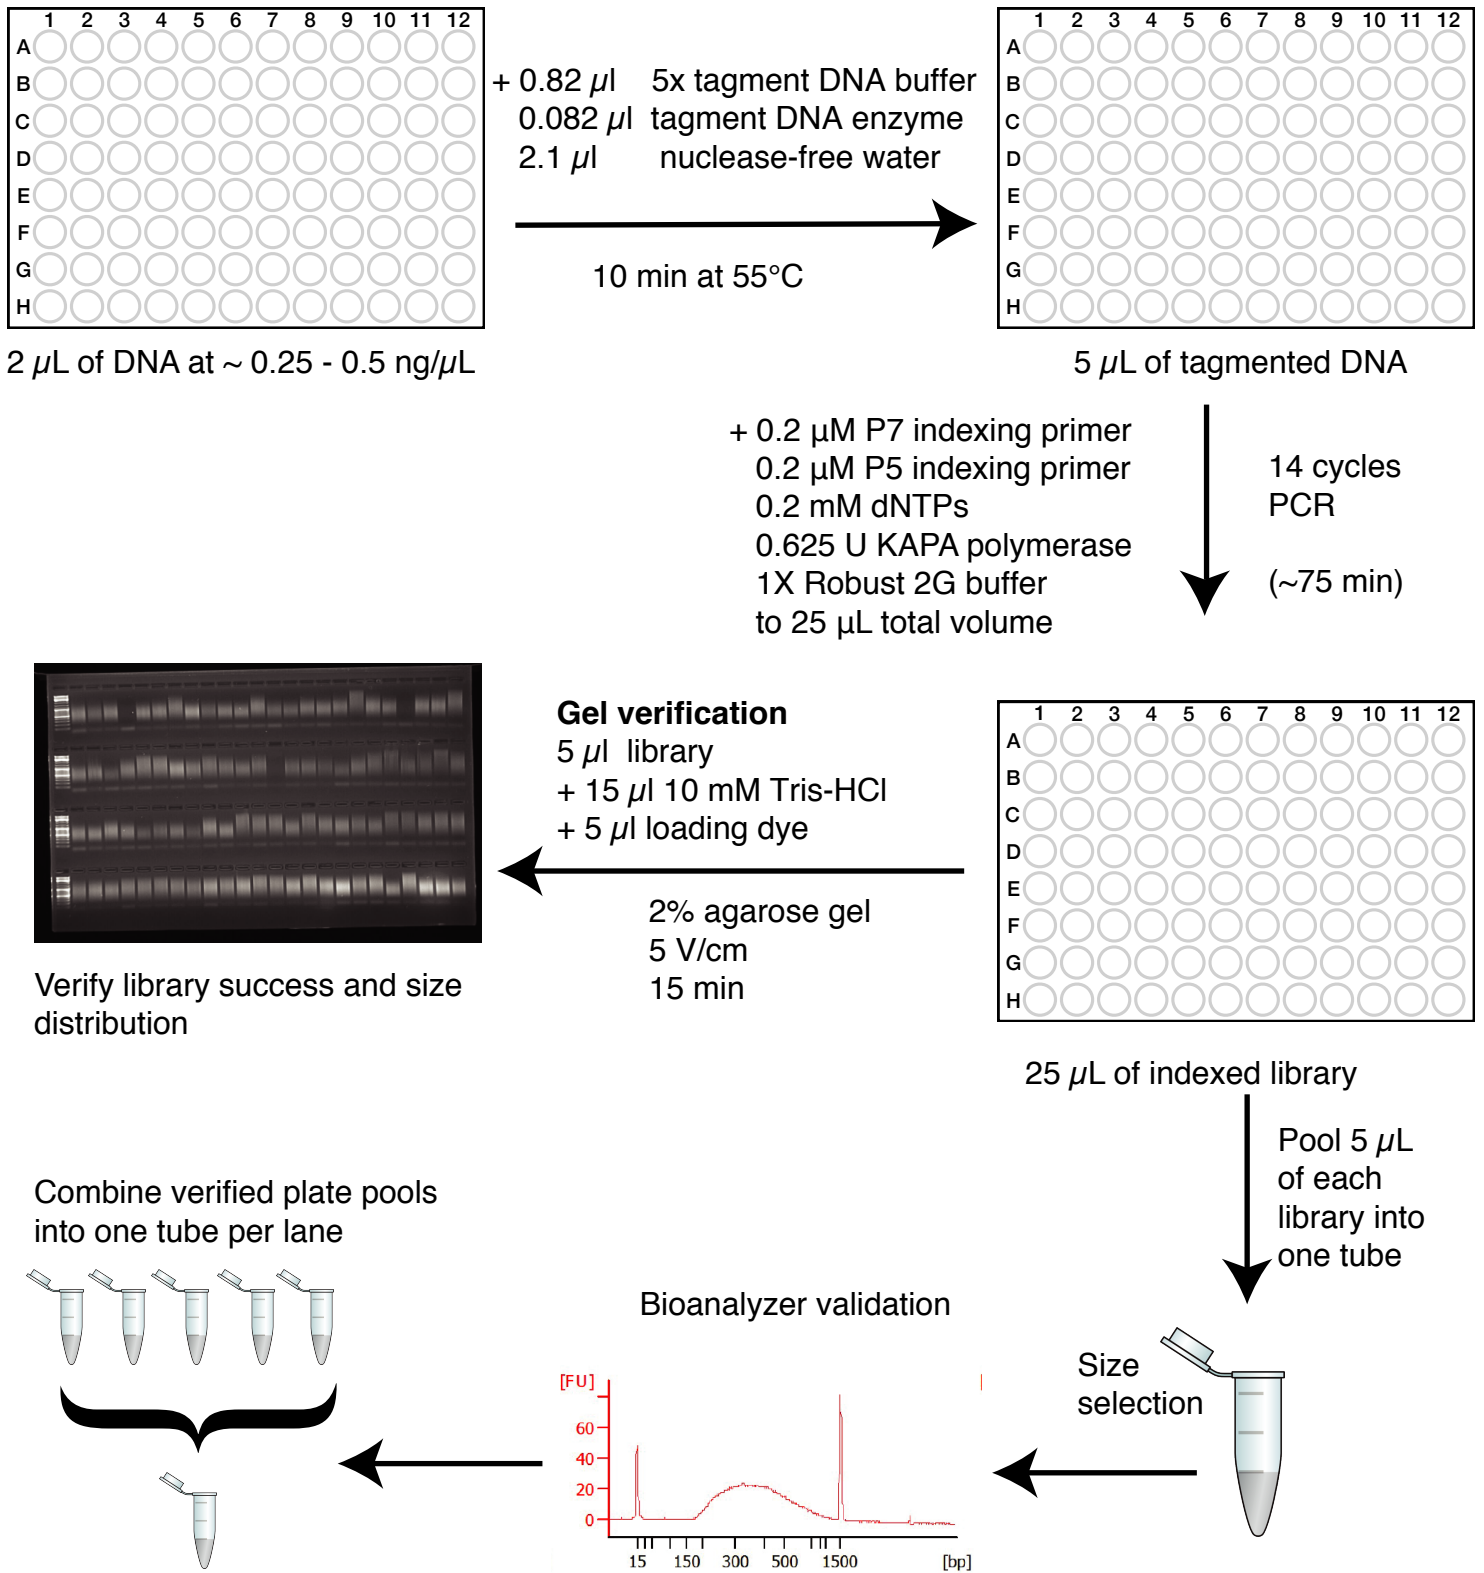

**Figure S1. Workflow diagram for genomic DNA library preparation using Nextera LITE.** Gel verification step is optional, but recommended. Workflow as presented requires about 2 - 3 hours of time. Multiple plates can be processed at the same time. Before sequencing, determine which plates have complementary sets of indices (see File S1) and can therefore be pooled into a single lane. Mix each individual 96-sample pool at an equimolar ratio in the final tube containing all libraries to be sequenced in a single lane. Image credits: 96-well plate: <https://doi.org/10.6084/m9.figshare.928645.v1>. Tube: <https://d1png.com/png/4176297>
