# Supplementary material
Source: publisher figshare collection journal article supplement (https://gsajournals.figshare.com/articles/dataset/_/9733838)
Supplement: Supplementary file 16 [file 1]

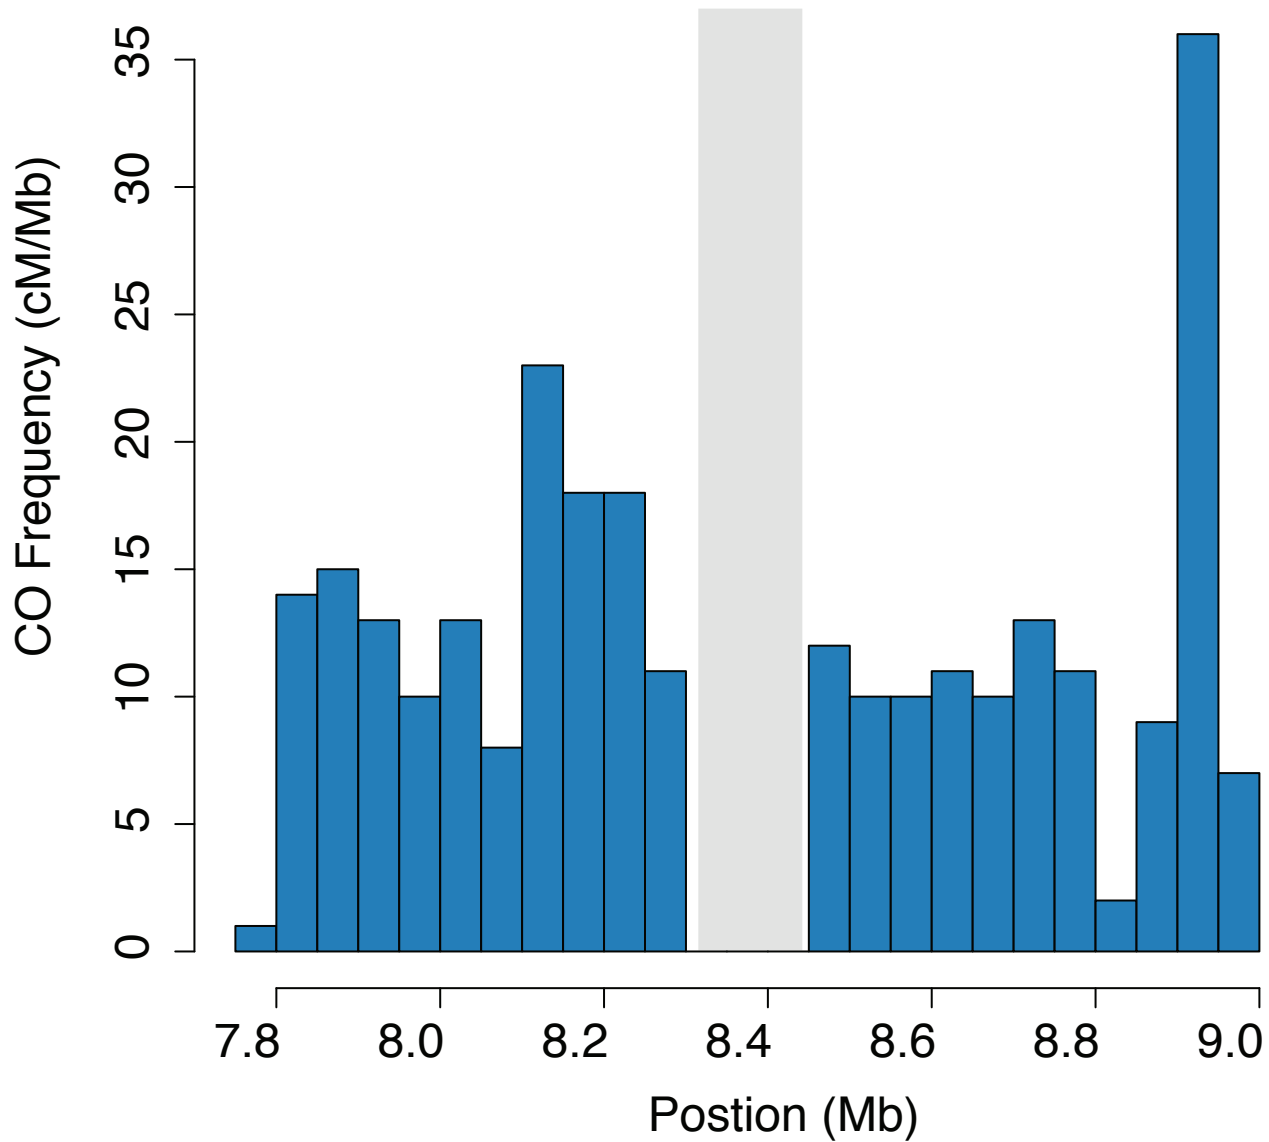

**Figure S6. Crossover frequencies adjacent to a 170-kb inversion on chromosome 3.** CO frequencies (cM/Mb) are plotted in 50-kb bins around the inversion (light gray shaded region).
