# Supplementary material
Source: publisher figshare collection journal article supplement (https://gsajournals.figshare.com/articles/dataset/_/9733838)

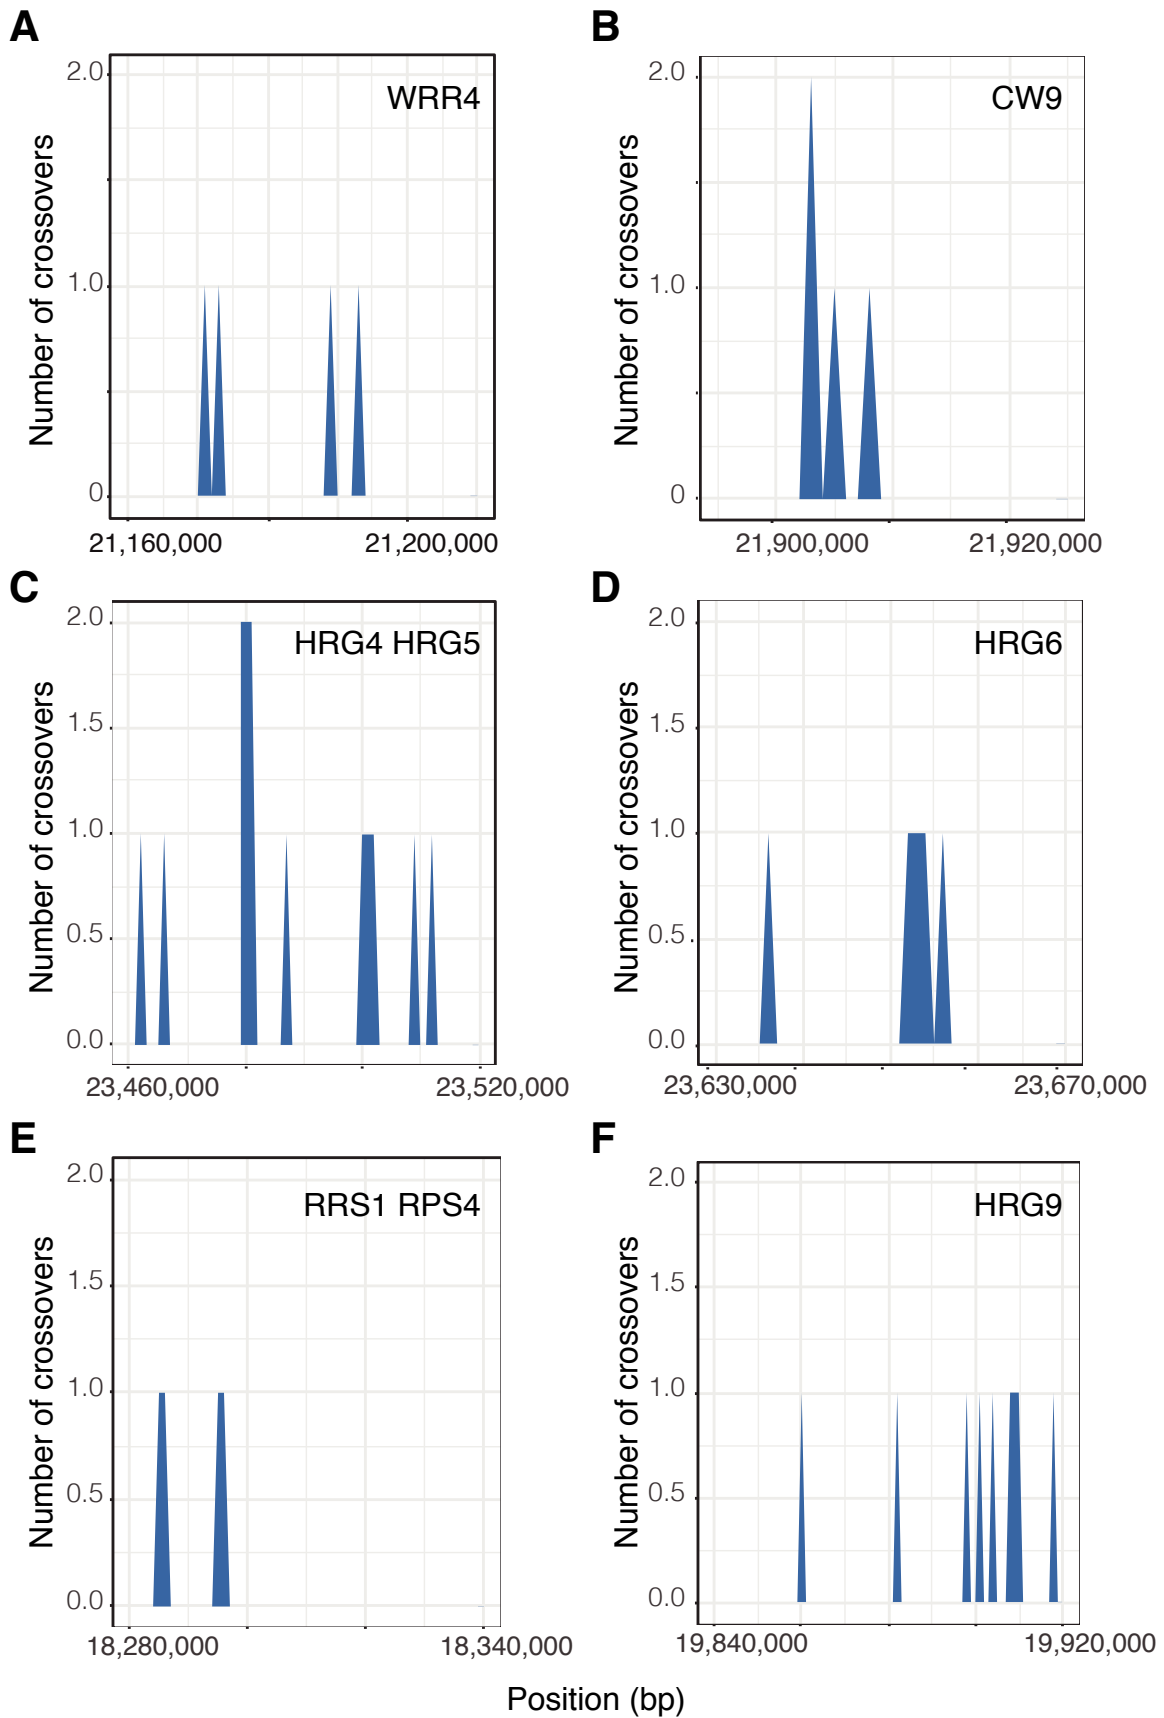

**Figure S13. Locations of COs in six focal NLR loci.** These loci were also studied in (Choi et al. 2016).

Supplement: Supplementary file 8 [file 1]
